# Supplementary material
Source: MDPI journal article supplement (https://www.mdpi.com/2077-1312/9/6/646)
Supplement: s1 [file s1]

## The following supplement accompanies the article

**Table S1.** Results from the post-hoc pairwise comparison Dunn's test of estimated source levels per month and for the OBS H- and Z-channel deployed off southwest Portugal. Grey shaded cells show not statistical significant levels ( $p>0.5$ ).

| Months  | H-channel          | Z-channel           |
|---------|--------------------|---------------------|
| Jan-Feb | Z=9.23, $p<0.001$  | Z=10.88, $p<0.001$  |
| Jan-Mar | Z=2.31, $p<0.05$   | Z=6.78, $p<0.001$   |
| Jan-Apr | Z=11.23, $p<0.001$ | Z=14.77, $p<0.001$  |
| Jan-Nov | Z=3.41, $p<0.001$  | Z=19.05, $p<0.001$  |
| Jan-Dec | Z=11.12, $p<0.001$ | Z=23.94, $p<0.001$  |
| Feb-Mar | Z=0.35, $p=0.7$    | Z=4.47, $p<0.001$   |
| Feb-Apr | Z=7.73, $p<0.001$  | Z=10.63, $p<0.001$  |
| Feb-Nov | Z=1.29, $p=0.2$    | Z=-13.23, $p<0.001$ |
| Feb-Dec | Z=-5.32, $p<0.001$ | Z=-16.82, $p<0.001$ |
| Mar-Apr | Z=3.59, $p<0.001$  | Z=1.42, $p=0.2$     |
| Mar-Nov | Z=0.84, $p=0.4$    | Z=-0.98, $p=0.4$    |
| Mar-Dec | Z=-1.46, $p=0.2$   | Z=-1.39, $p=0.2$    |
| Apr-Nov | Z=7.39, $p<0.001$  | Z=0.83, $p=0.4$     |
| Apr-Dec | Z=4.03, $p<0.001$  | Z=0.26, $p=0.7$     |
